# Supplementary material for: Uranium handling at the Oak Ridge Gaseous Diffusion Plant
Source: Royal Society of Chemistry journal article supplement (doi:10.1039/d4dt00188e), 1975-10-31
Supplement: d4dt00188e1.pdf [file d4dt00188e1.pdf]

## Supporting Information

# Tunable Benzamidinate Zinc Complexes: Coordination Modes and Catalytic Activity in the Ring-Opening Polymerization of L-lactide

Chen-Chieh Chang,<sup>a</sup> Ming-Tsz Chen,<sup>b,\*</sup> Tzu-Lun Huang<sup>a</sup> and Chi-Tien Chen<sup>a,c,\*</sup>

*a.* Department of Chemistry, National Chung Hsing University, Taichung 402, Taiwan, ROC.

*b.* Department of Applied Chemistry, Providence University, Taichung 43301, Taiwan, ROC.

*c.* i-Center for Advanced Science and Technology, National Chung Hsing University, Taichung 402, Taiwan, ROC.

\*E-mail: [mschen@pu.edu.tw](mailto:mschen@pu.edu.tw) (M.-T. Chen); [ctchen@dragon.nchu.edu.tw](mailto:ctchen@dragon.nchu.edu.tw) (C.-T. Chen)

### Table of Contents:

---

|    |                                                                                                                         |     |
|----|-------------------------------------------------------------------------------------------------------------------------|-----|
| 1. | Crystal structures data.....                                                                                            | S2  |
| 2. | Spectra of ligand precursors <b>L1a-L1b</b> and complexes <b>1-7</b> .....                                              | S3  |
| 3. | HSQC and DOSY spectra of complex <b>6</b> .....                                                                         | S11 |
| 4. | <sup>1</sup> H and <sup>13</sup> C{ <sup>1</sup> H} NMR spectra of PLA-50 catalyzed by <b>7</b> in toluene at 25°C..... | S12 |
| 5. | <sup>1</sup> H NMR spectrum of PLA-50 catalyzed by <b>2</b> /BnOH in toluene at 50°C.....                               | S13 |
| 6. | <sup>1</sup> H NMR spectrum of PLA-50 catalyzed by <b>7</b> /BnOH in toluene at 25°C.....                               | S13 |
| 7. | <sup>1</sup> H NMR study of the Mechanism in the ROP of L-lactide.....                                                  | S14 |
| 8. | MALDI-TOF mass analysis of prepared PLAs.....                                                                           | S16 |

## Crystal structure data

**Table S1.** Crystallographic data and refinement details for complexes **1-4** and **7**

|                                                                          | <b>1</b>                                                       | <b>2</b>                                                                      | <b>3</b>                                                       | <b>4</b>                                                       | <b>7</b>                                          |
|--------------------------------------------------------------------------|----------------------------------------------------------------|-------------------------------------------------------------------------------|----------------------------------------------------------------|----------------------------------------------------------------|---------------------------------------------------|
| Formula                                                                  | C <sub>38</sub> H <sub>48</sub> N <sub>4</sub> Zn <sub>2</sub> | C <sub>36</sub> H <sub>44</sub> N <sub>4</sub> O <sub>2</sub> Zn <sub>2</sub> | C <sub>38</sub> H <sub>50</sub> N <sub>6</sub> Zn <sub>2</sub> | C <sub>68</sub> H <sub>76</sub> N <sub>8</sub> Zn <sub>2</sub> | C <sub>38</sub> H <sub>32</sub> N <sub>6</sub> Zn |
| Fw                                                                       | 691.54                                                         | 695.49                                                                        | 721.58                                                         | 1136.11                                                        | 638.07                                            |
| T, K                                                                     | 100(2)                                                         | 100(2)                                                                        | 100(2)                                                         | 100(2)                                                         | 100(2)                                            |
| Crystal system                                                           | Triclinic                                                      | Monoclinic                                                                    | Monoclinic                                                     | Monoclinic                                                     | Orthorhombic                                      |
| Space group                                                              | <i>P</i> -1                                                    | <i>C</i> <sub>2</sub> / <i>c</i>                                              | <i>P</i> 2(1)/ <i>n</i>                                        | <i>C</i> <sub>2</sub> / <i>c</i>                               | <i>P</i> <sub>bca</sub>                           |
| <i>a</i> , Å                                                             | 9.4824(4)                                                      | 12.7899(4)                                                                    | 8.4604(2)                                                      | 14.8451(4)                                                     | 13.3353(3)                                        |
| <i>b</i> , Å                                                             | 10.0818(5)                                                     | 12.0267(3)                                                                    | 9.6640(2)                                                      | 20.7782(5)                                                     | 18.1750(4)                                        |
| <i>c</i> , Å                                                             | 10.7058(4)                                                     | 22.7927(6)                                                                    | 22.0213(5)                                                     | 20.2976(5)                                                     | 26.2092(6)                                        |
| <i>α</i> °                                                               | 103.486(4)                                                     | 90                                                                            | 90                                                             | 90                                                             | 90                                                |
| <i>β</i> °                                                               | 104.402(4)                                                     | 92.379(2)                                                                     | 98.548(2)                                                      | 103.280(3)                                                     | 90                                                |
| <i>γ</i> °                                                               | 109.408(4)                                                     | 90                                                                            | 90                                                             | 90                                                             | 90                                                |
| <i>V</i> , Å <sup>3</sup>                                                | 877.31(7)                                                      | 3502.96(17)                                                                   | 1780.49(7)                                                     | 6093.5(3)                                                      | 6352.3(2)                                         |
| <b>Z</b>                                                                 | 1                                                              | 4                                                                             | 2                                                              | 4                                                              | 8                                                 |
| $\rho_{\text{calc}}$ , Mg/m <sup>3</sup>                                 | 1.309                                                          | 1.319                                                                         | 1.346                                                          | 1.238                                                          | 1.334                                             |
| $\mu$ (Mo K $\alpha$ ), mm <sup>-1</sup>                                 | 1.398                                                          | 1.405                                                                         | 1.382                                                          | 0.834                                                          | 0.810                                             |
| Reflections collected                                                    | 7035                                                           | 15350                                                                         | 13549                                                          | 15464                                                          | 36959                                             |
| No. of parameters                                                        | 199                                                            | 199                                                                           | 221                                                            | 352                                                            | 406                                               |
| Indep. reflns                                                            | 3973                                                           | 4300                                                                          | 4231                                                           | 7071                                                           | 7946                                              |
| ( <i>R</i> <sub>int</sub> )                                              | (0.0146)                                                       | (0.0237)                                                                      | (0.0171)                                                       | (0.0391)                                                       | (0.0235)                                          |
| Final R indices                                                          | 0.0241,                                                        | 0.0274,                                                                       | 0.0338,                                                        | 0.0455,                                                        | 0.0276,                                           |
| <i>R</i> <sub>1</sub> <sup>a</sup> , <i>wR</i> <sub>2</sub> <sup>a</sup> | 0.0738                                                         | 0.0698                                                                        | 0.1230                                                         | 0.0699                                                         | 0.0738                                            |
| <i>R</i> indices (all data)                                              | 0.0264,<br>0.0748                                              | 0.0379,<br>0.0716                                                             | 0.0414,<br>0.1267                                              | 0.0854,<br>0.0731                                              | 0.0433,<br>0.0779                                 |
| GoF <sup>b</sup>                                                         | 1.040                                                          | 1.017                                                                         | 1.024                                                          | 1.030                                                          | 1.034                                             |

<sup>a</sup>  $P_1 = [\sum(|\Phi_0| - |\Phi_\chi|) / \sum |\Phi_0|]$ ;  $\omega P_2 = [\sum \omega(\Phi_0^2 - \Phi_\chi^2) / \sum \omega(\Phi_0^2)]^{1/2}$ ,  $\omega = 0.10$ .

<sup>b</sup> GoF =  $[\sum w(F_0^2 - F_c^2)^2 / (N_{\text{reflns}} - N_{\text{params}})]^{1/2}$

## Spectra of ligand precursors L1a-L1b

### <sup>1</sup>H NMR of L1a in CDCl<sub>3</sub>

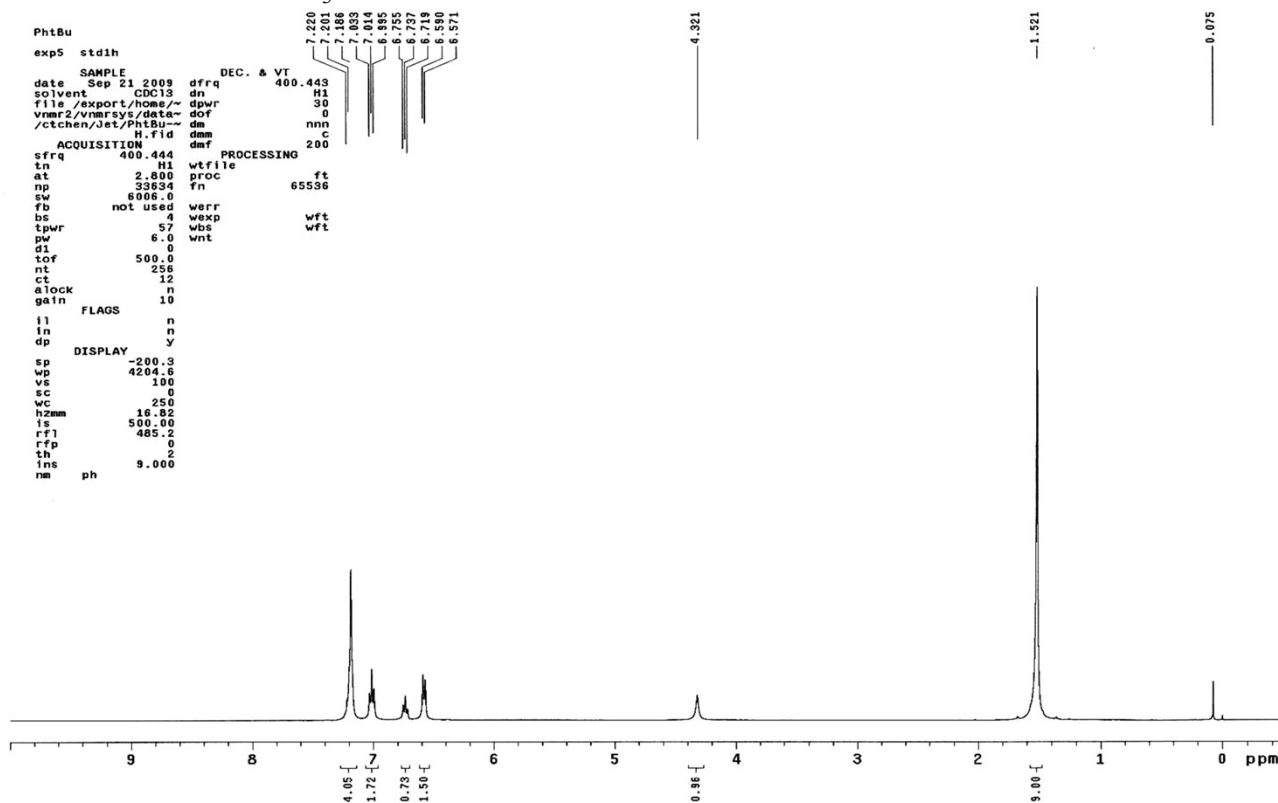

### <sup>1</sup>H NMR of L1b in CDCl<sub>3</sub>

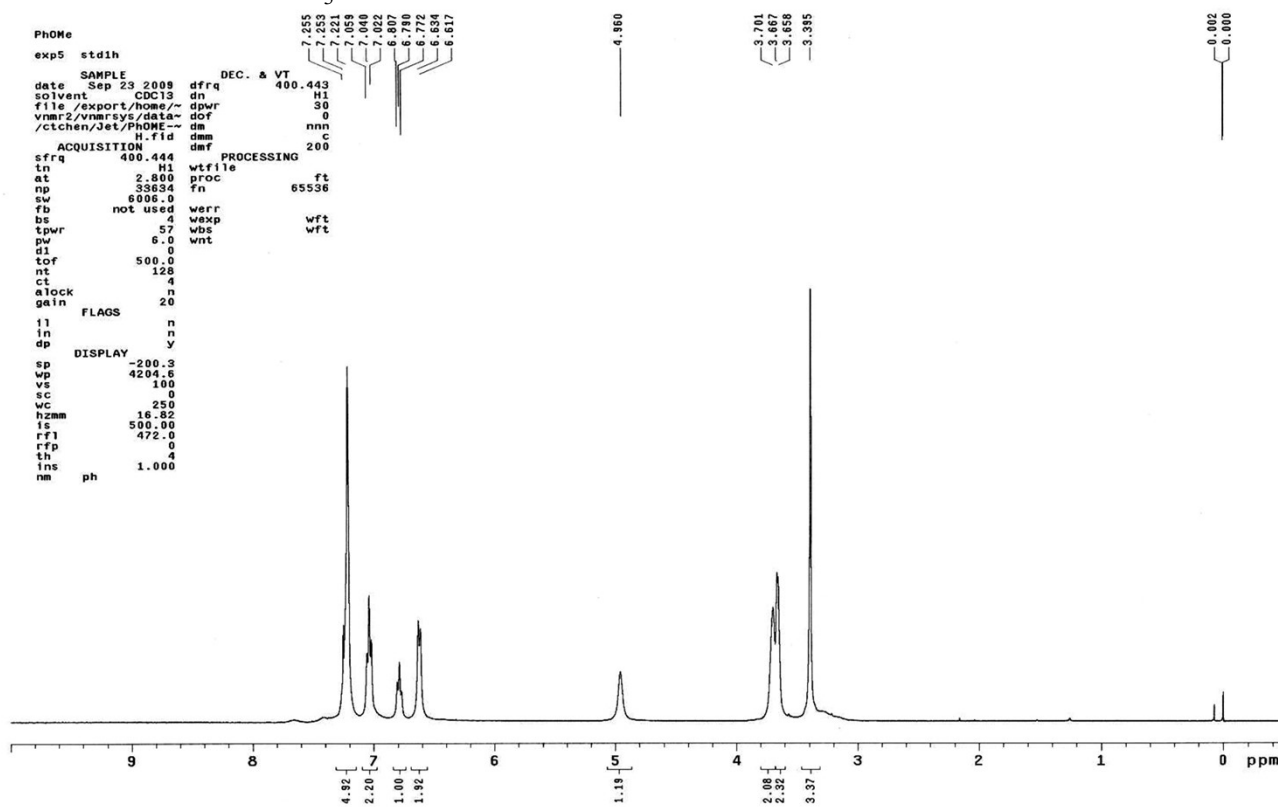

# Spectra of complexes 1-7

$^1\text{H}$  NMR of complex 1 in  $\text{C}_6\text{D}_6$

ZnEt(Ph-tBu-H)  
ZnEt(Ph-tBu)

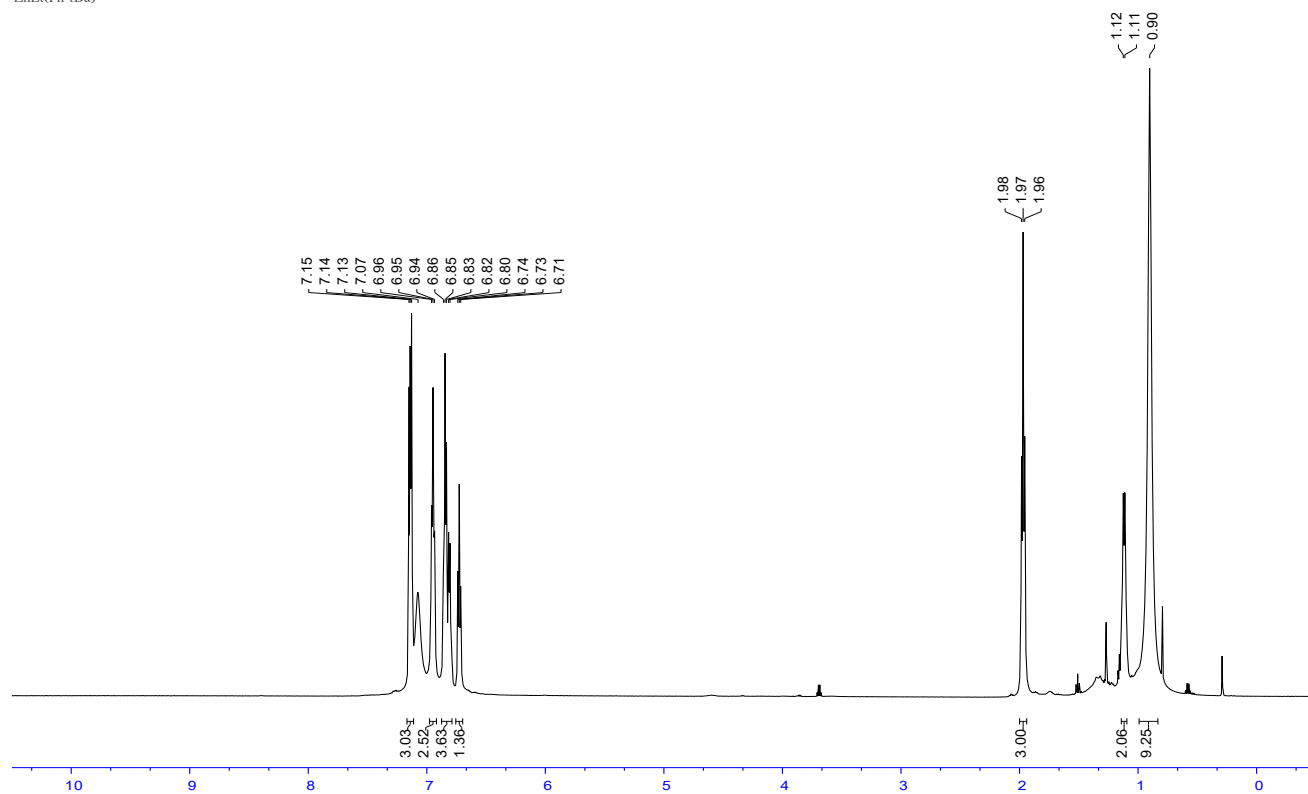

$^{13}\text{C}\{^1\text{H}\}$  NMR of complex 1 in  $\text{C}_6\text{D}_6$

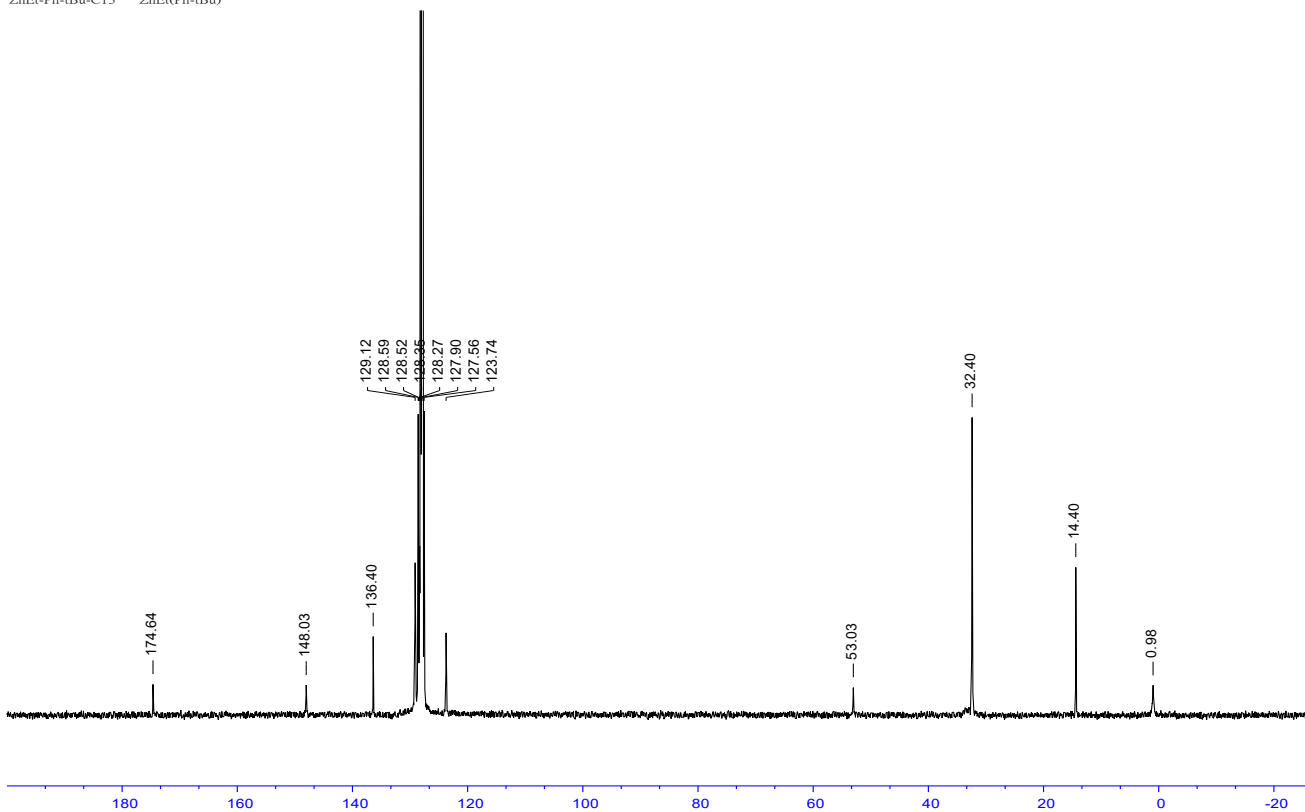

### <sup>1</sup>H NMR of complex **2** in CDCl<sub>3</sub>

ZnEt-Ph-OMe-H1  
ZnEt(Ph-OMe)

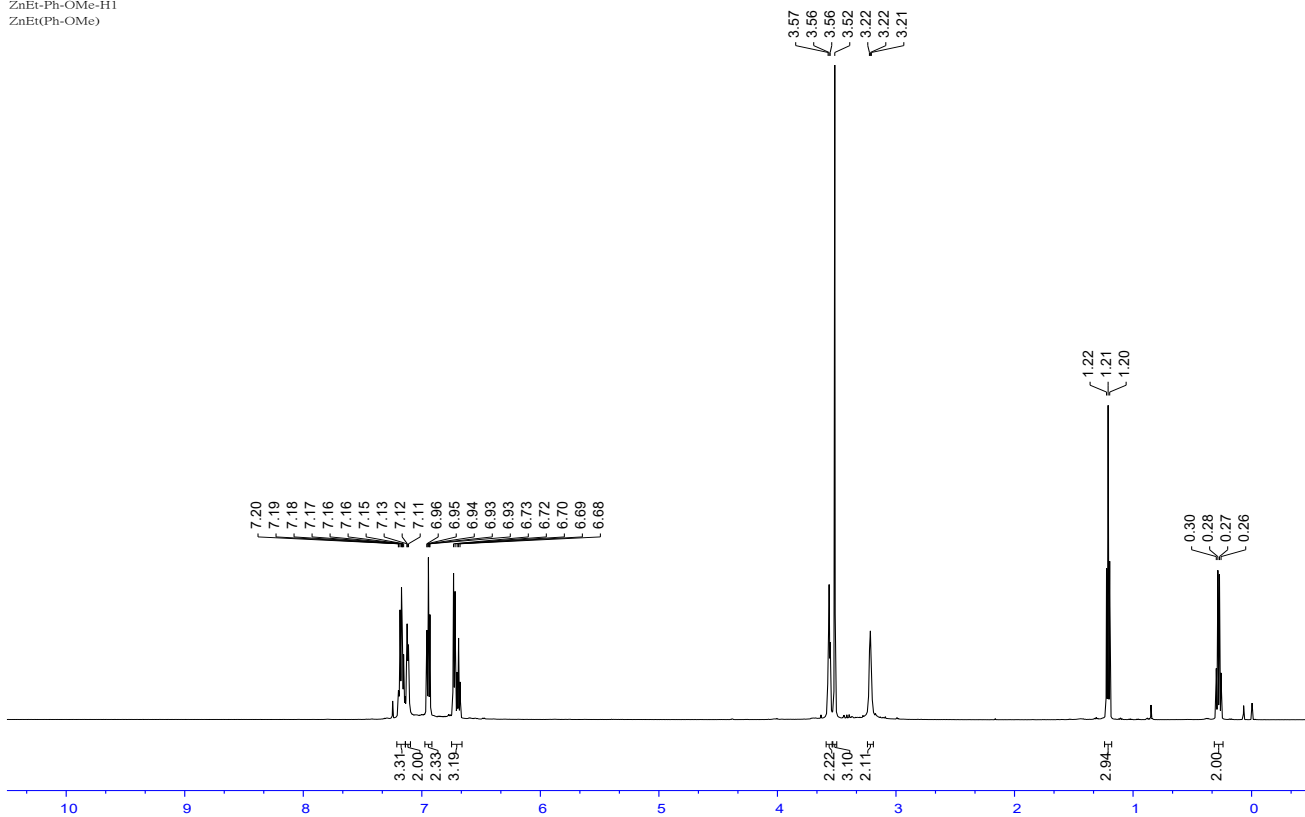

$^{13}\text{C}\{^1\text{H}\}$  NMR of complex **2** in  $\text{CDCl}_3$

ZnEt-Ph-OMe- $\text{C}^{13}$   
ZnEt(Ph-OMe)

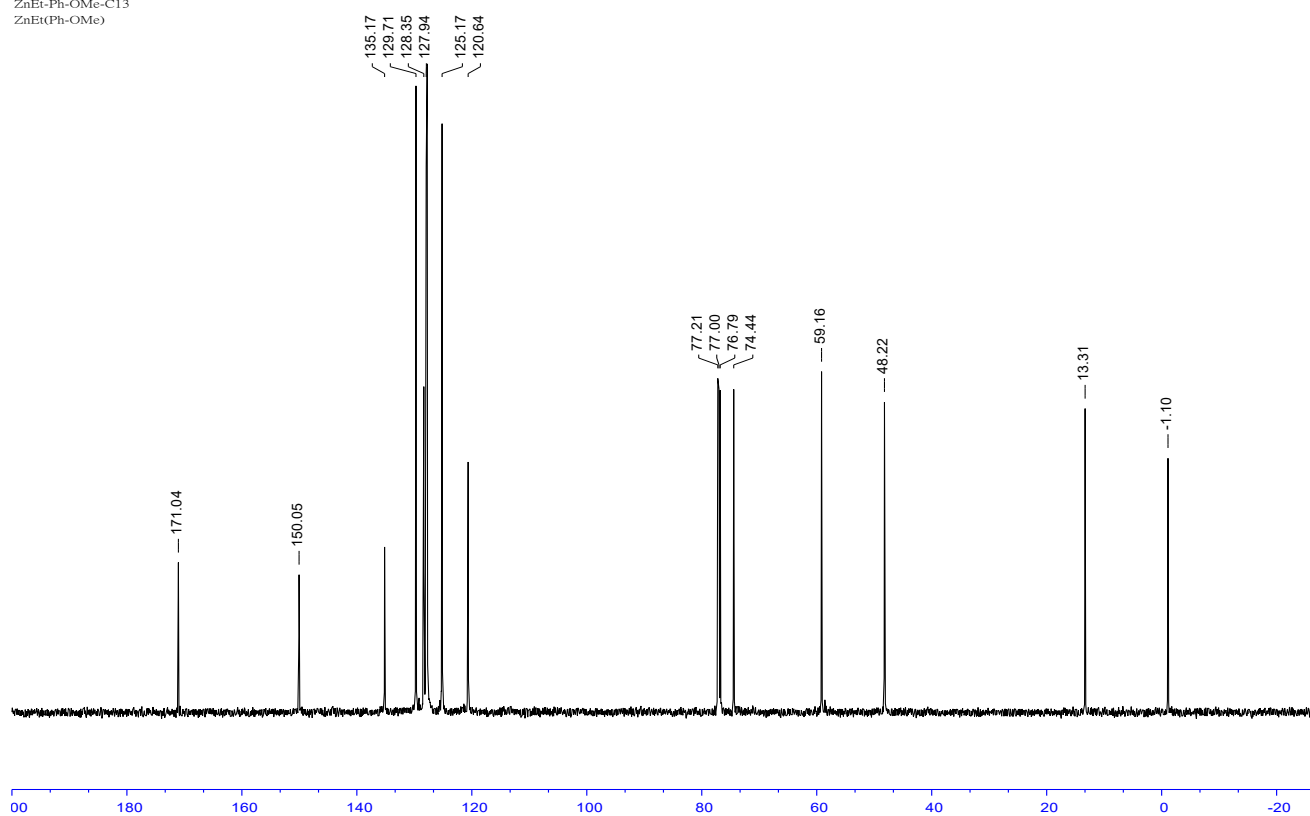

### $^1\text{H}$ NMR of complex **3** in $\text{C}_6\text{D}_6$

PhNPhNMe2-ZnEt-0110/1H  
PhNPhNMe2-ZnEt-0110

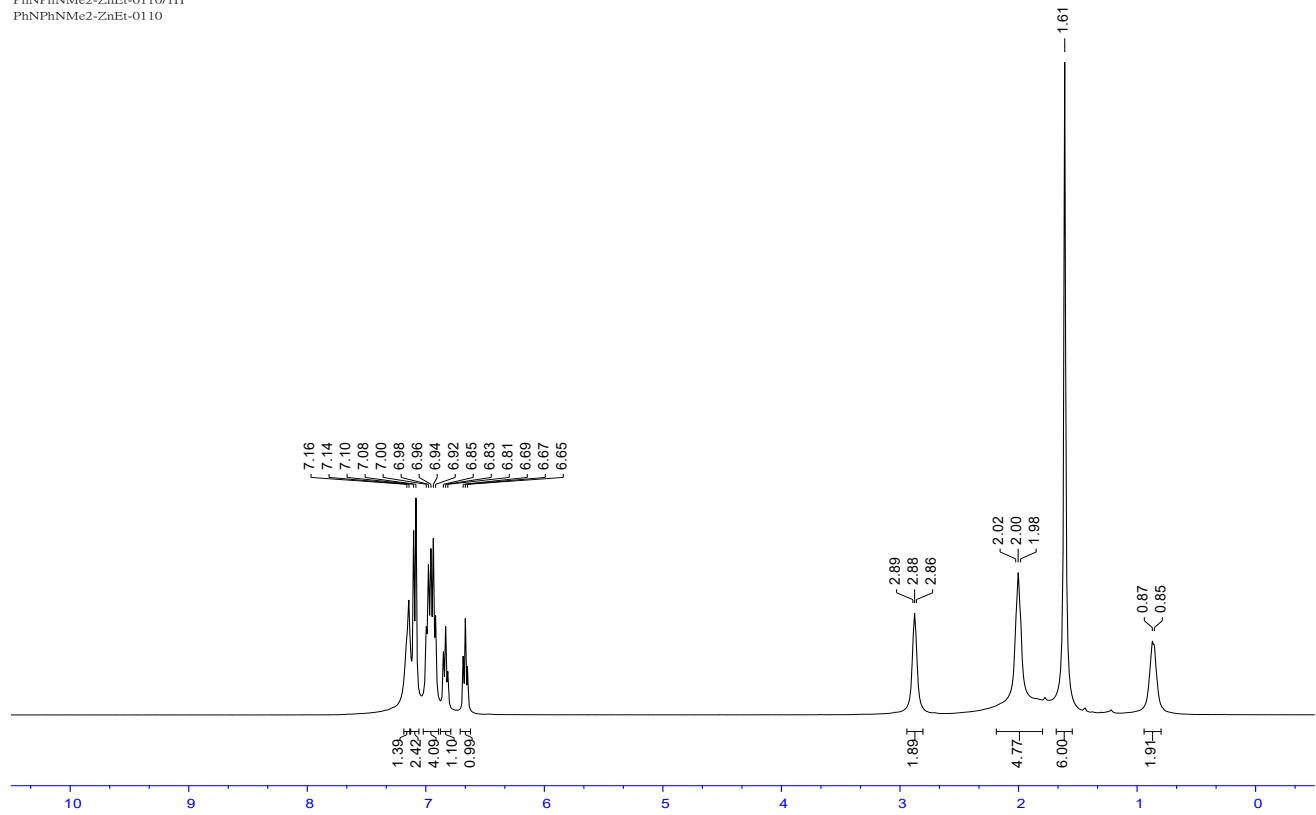

### $^{13}\text{C}\{^1\text{H}\}$ NMR of complex **3** in $\text{C}_6\text{D}_6$

PhNPhNMe2-ZnEt-0110.3.fid — PhNPhNMe2-ZnEt-13C

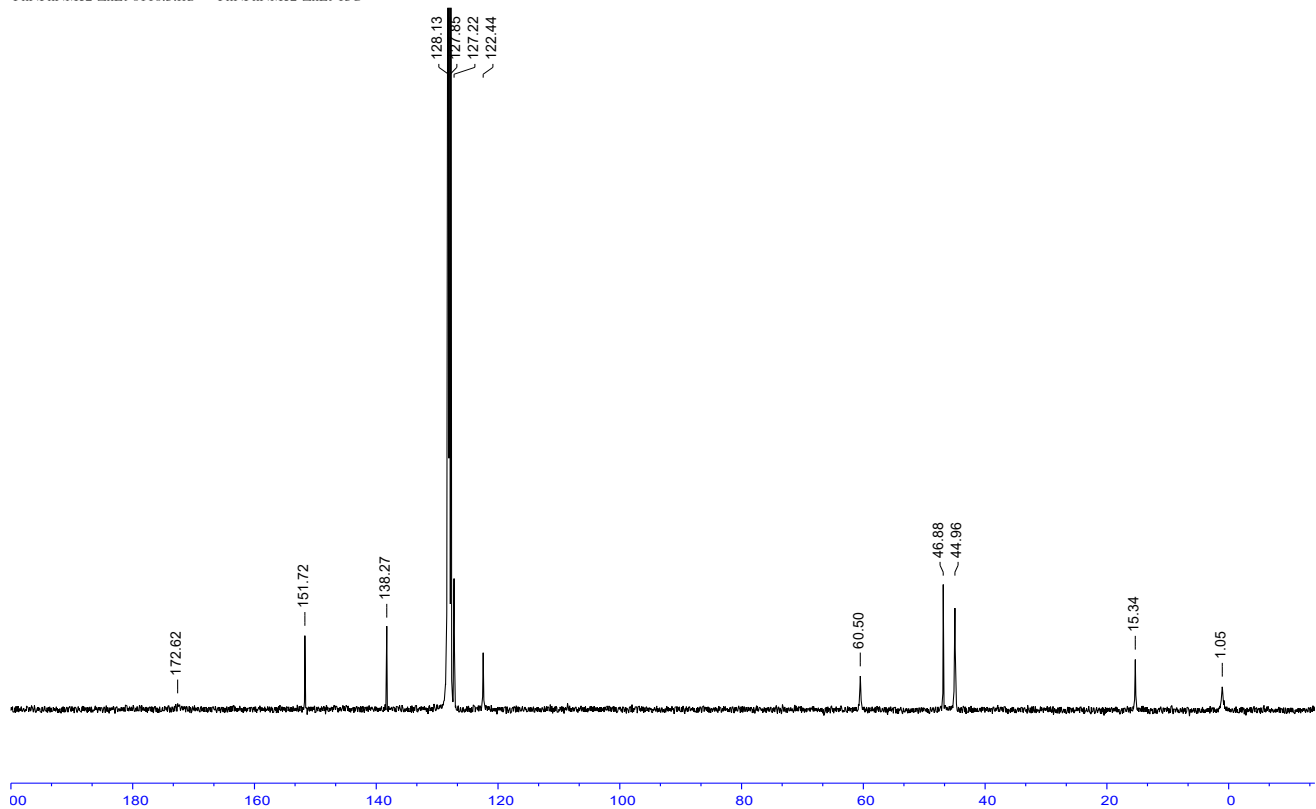

$^1\text{H}$  NMR of complex **4** in  $\text{C}_6\text{D}_6$

Zn-Ph-tBu2-H1  
Zn(Ph-tBu)2

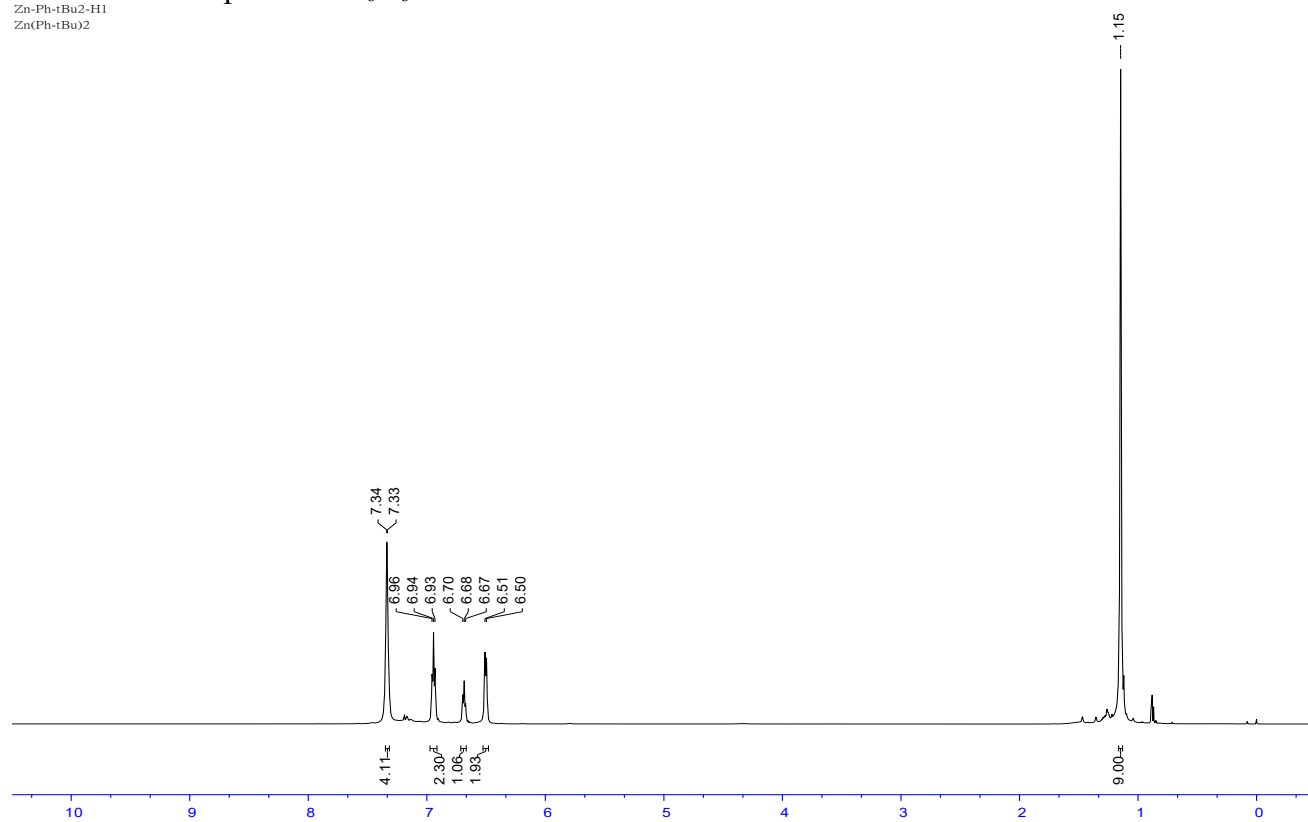

$^{13}\text{C}\{^1\text{H}\}$  NMR of complex **4** in  $\text{C}_6\text{D}_6$



Zn-Ph-tBu2-C13  
Zn(Ph-tBu)2

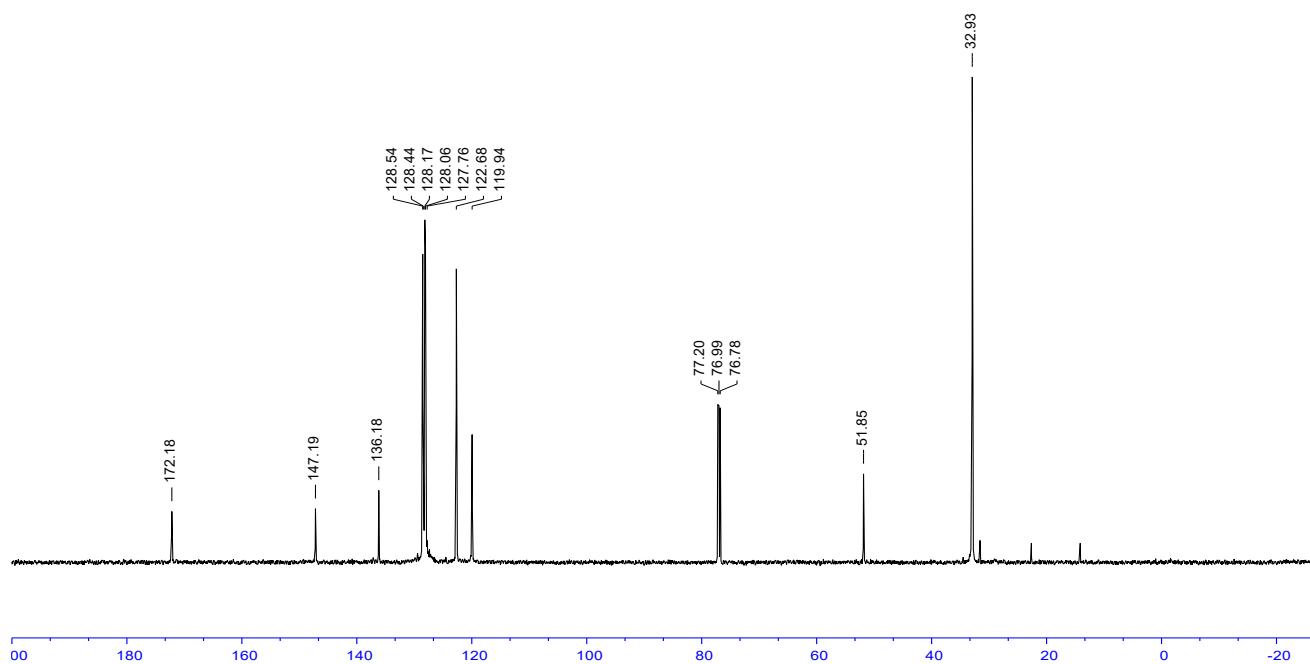

### $^1\text{H}$ NMR of complex 5 in $\text{C}_6\text{D}_6$

Zn-Ph-OMe2-H2  
Zn(Ph-OMe) $_2$

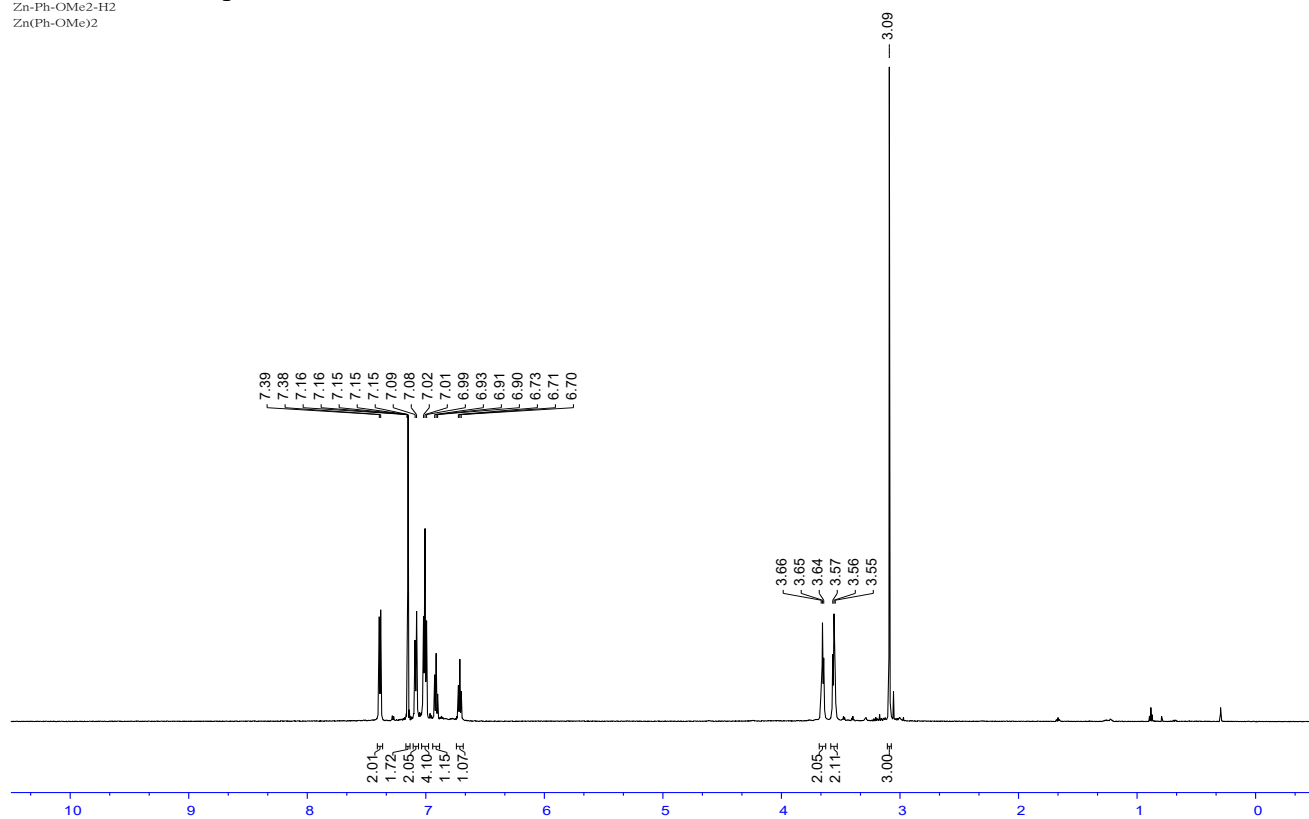

$^{13}\text{C}\{^1\text{H}\}$  NMR of complex **5** in  $\text{C}_6\text{D}_6$

Zn-Ph-OMe2-C13  
Zn(Ph-OMe)2

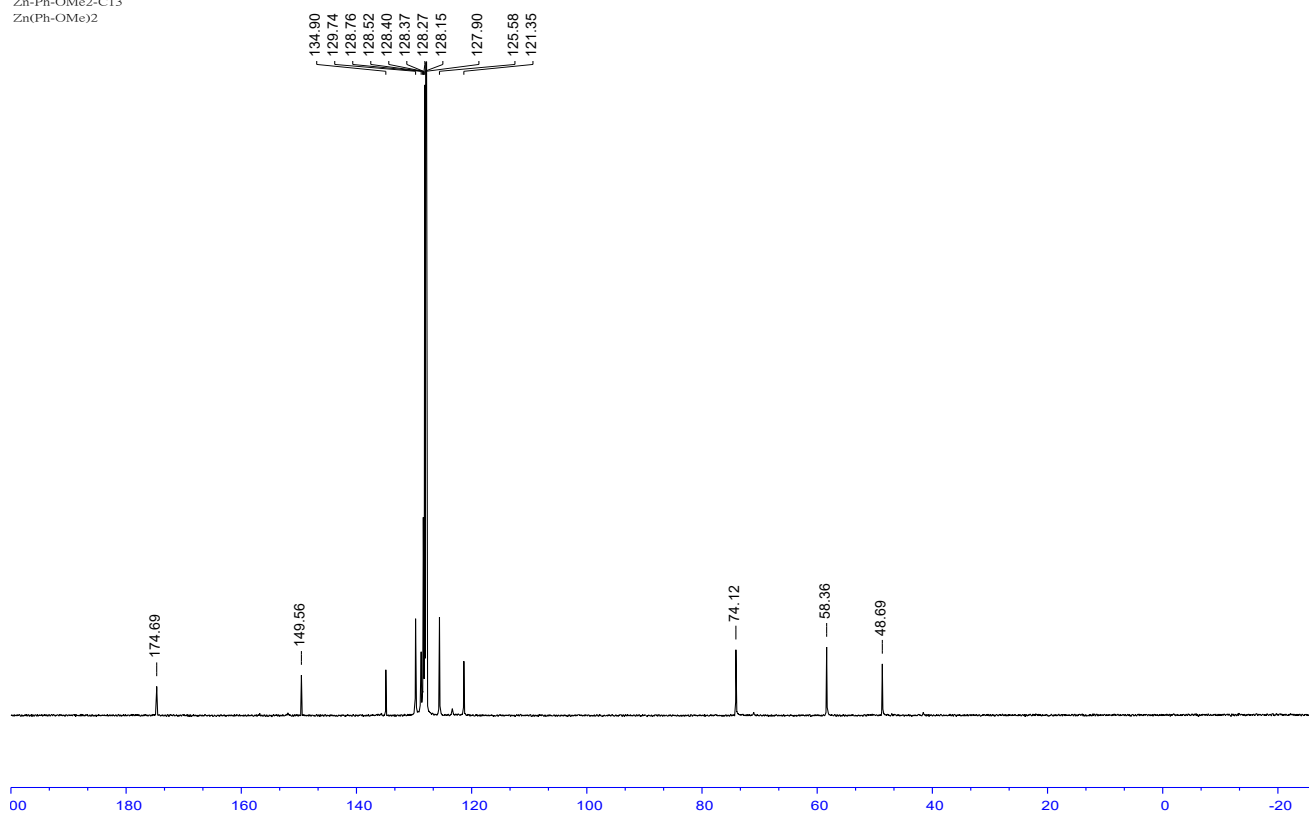

$^1\text{H}$  NMR of complex **6** in  $\text{C}_6\text{D}_6$

PhNPhNMe2-Zn-0111/1H  
PhNPhNMe2-Zn-1H

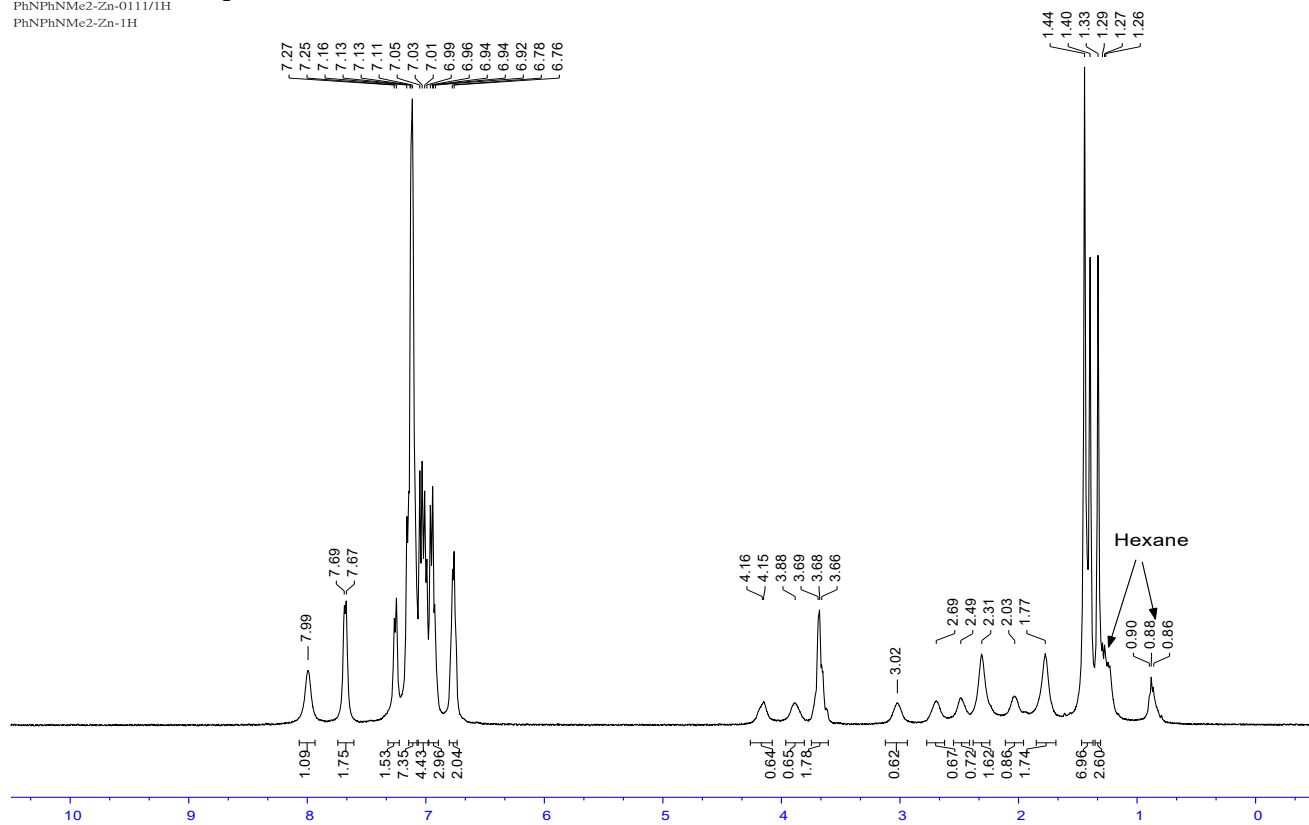

$^{13}\text{C}\{^1\text{H}\}$  NMR of complex **6** in  $\text{C}_6\text{D}_6$   
PhNPhNMe<sub>2</sub>-Zn-0111/13C  
PhNPhNMe<sub>2</sub>-Zn-13C

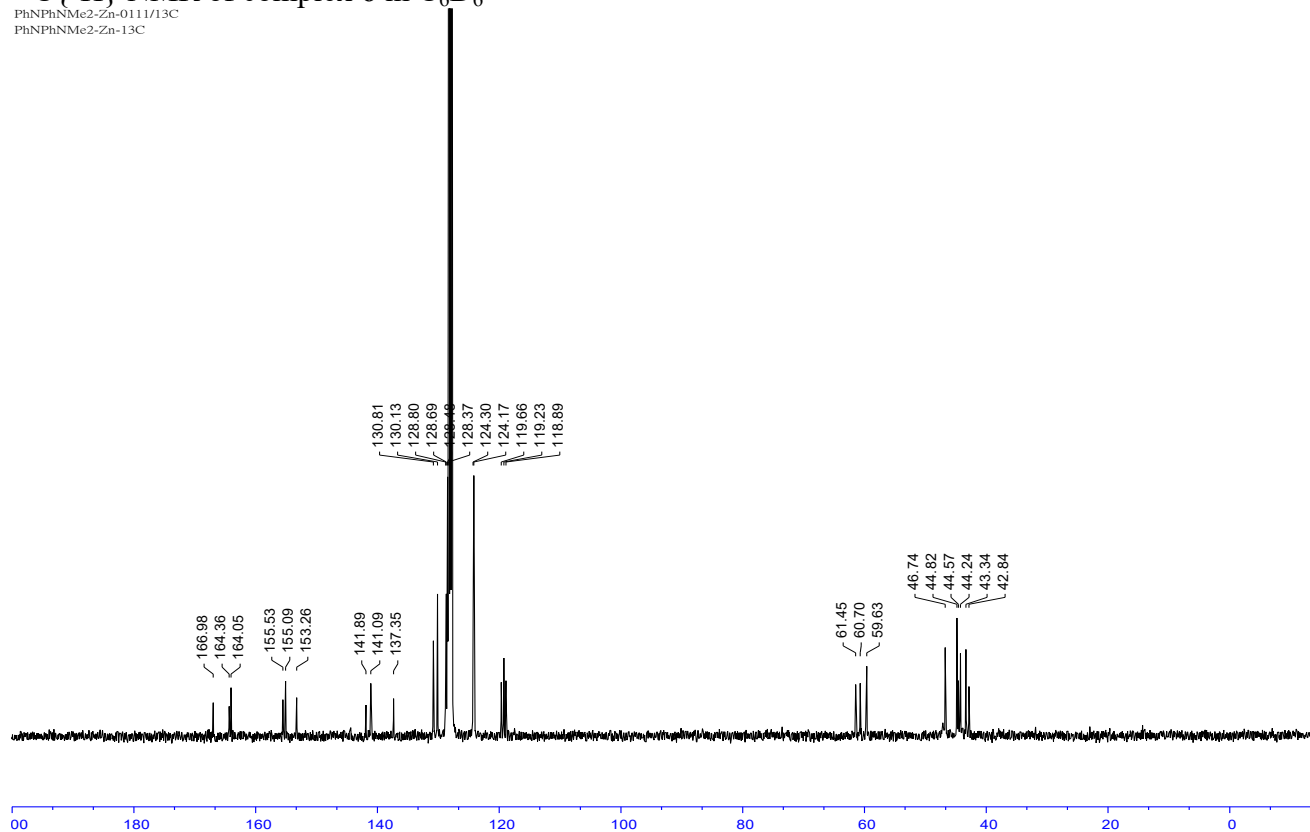

$^1\text{H}$  NMR of complex **7** in  $\text{CDCl}_3$

Zn-Ph-Py2-H1  
Zn(Ph-Py)2

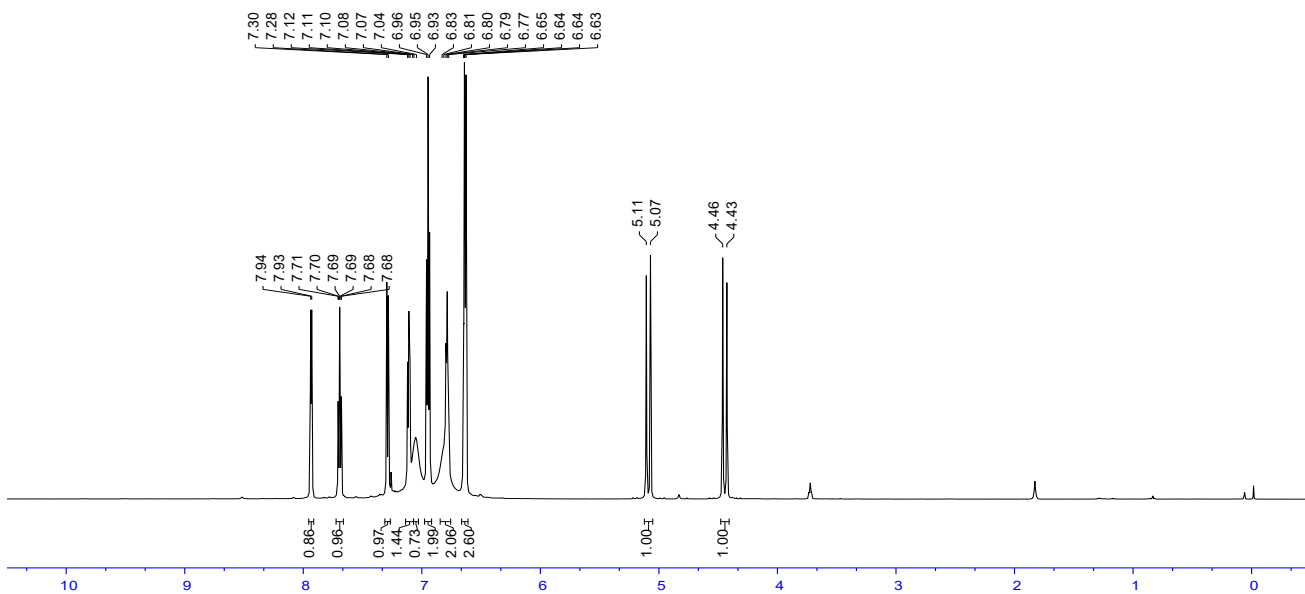

$^{13}\text{C}\{^1\text{H}\}$  NMR of complex **7** in CDCl<sub>3</sub>  
Zn-Ph-Py2-C15  
Zn(Ph-Py)2

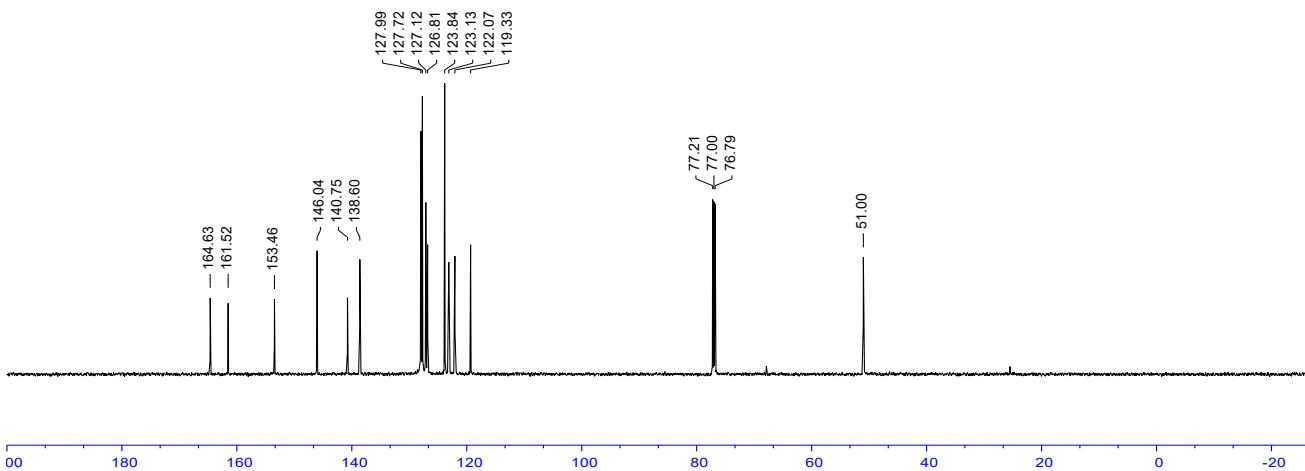

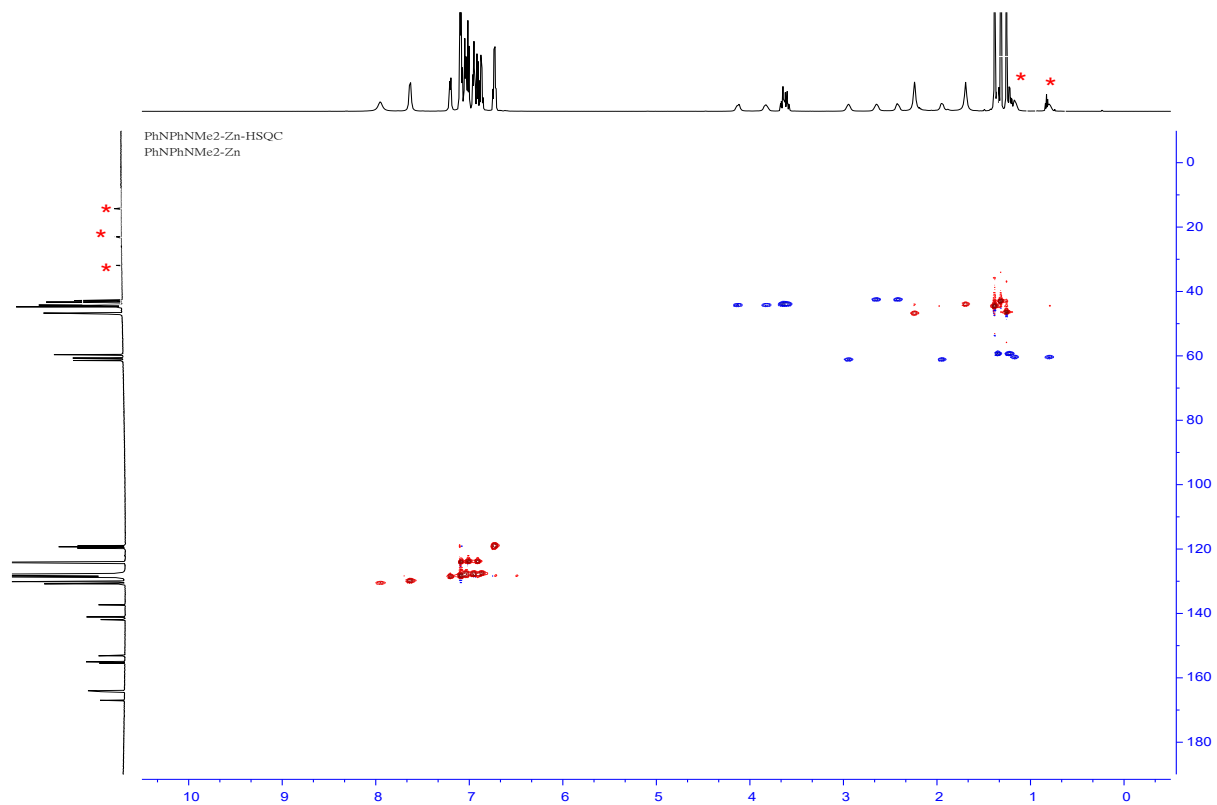

**Figure S1.** The HSQC NMR spectrum of complex **6** at 25°C in C<sub>6</sub>D<sub>6</sub> (\*: hexane).

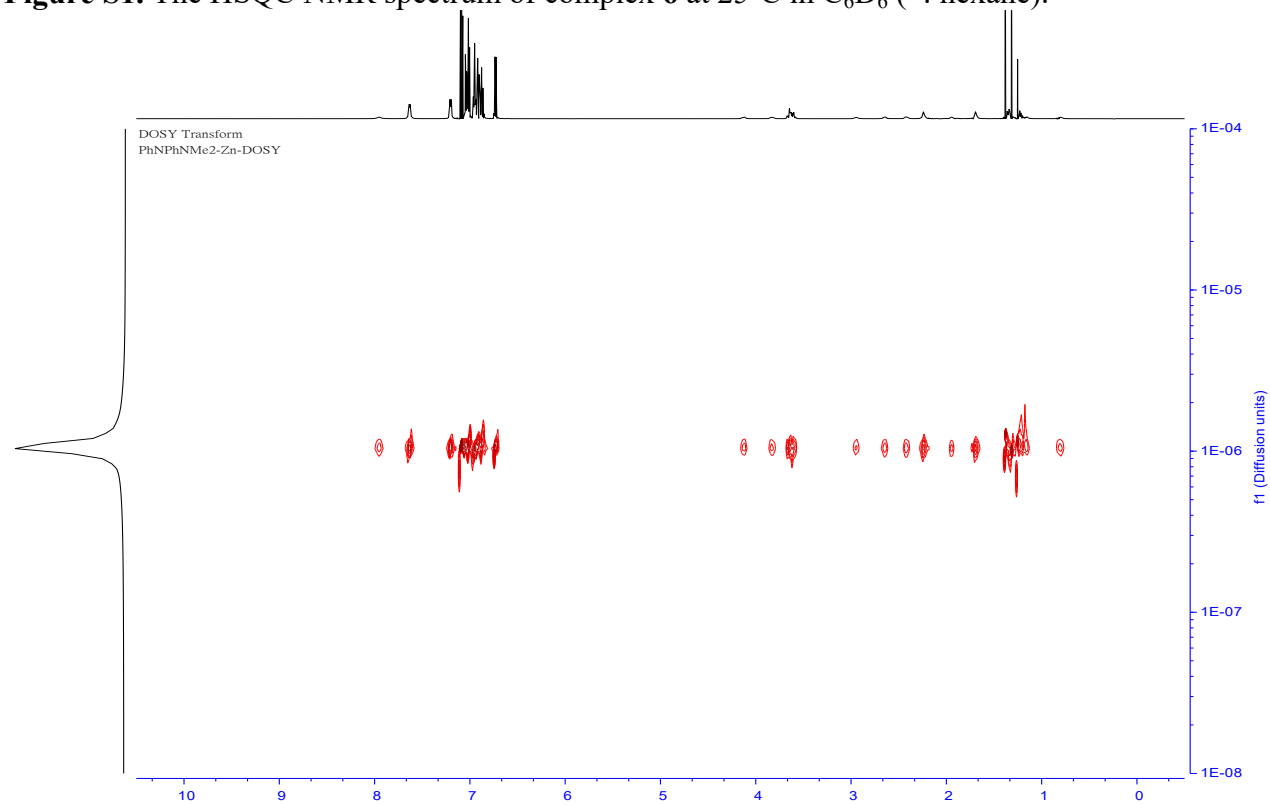

**Figure S2.** The <sup>1</sup>H DOSY NMR spectrum of complex **6** obtained at 25°C in C<sub>6</sub>D<sub>6</sub>.

PLA-without BnOH/1H  
PLA-without BnOH

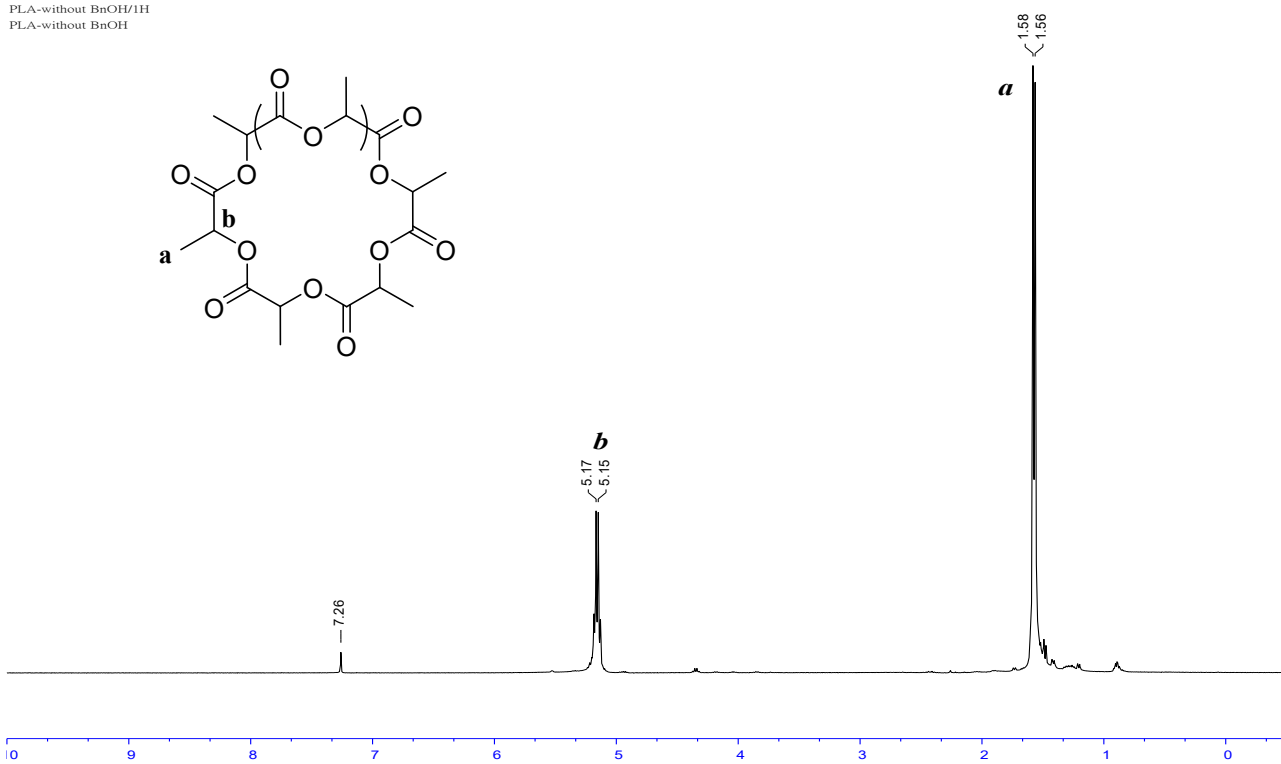

**Figure S3.** The  $^1\text{H}$  NMR spectrum ( $\text{CDCl}_3$ ) of PLA-50 catalyzed by **7** in toluene at  $25^\circ\text{C}$ .

PLA-without BnOH.7.fid  
PLA-without BnOH-13C

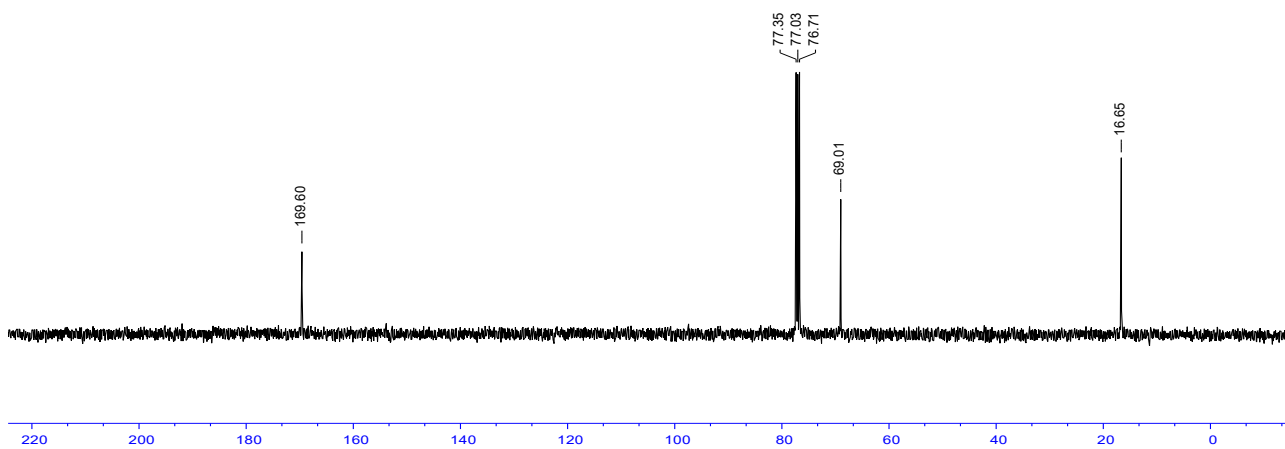

**Figure S4.** The  $^{13}\text{C}\{^1\text{H}\}$  NMR spectrum ( $\text{CDCl}_3$ ) of PLA-50 catalyzed by **7** in toluene at  $25^\circ\text{C}$ .

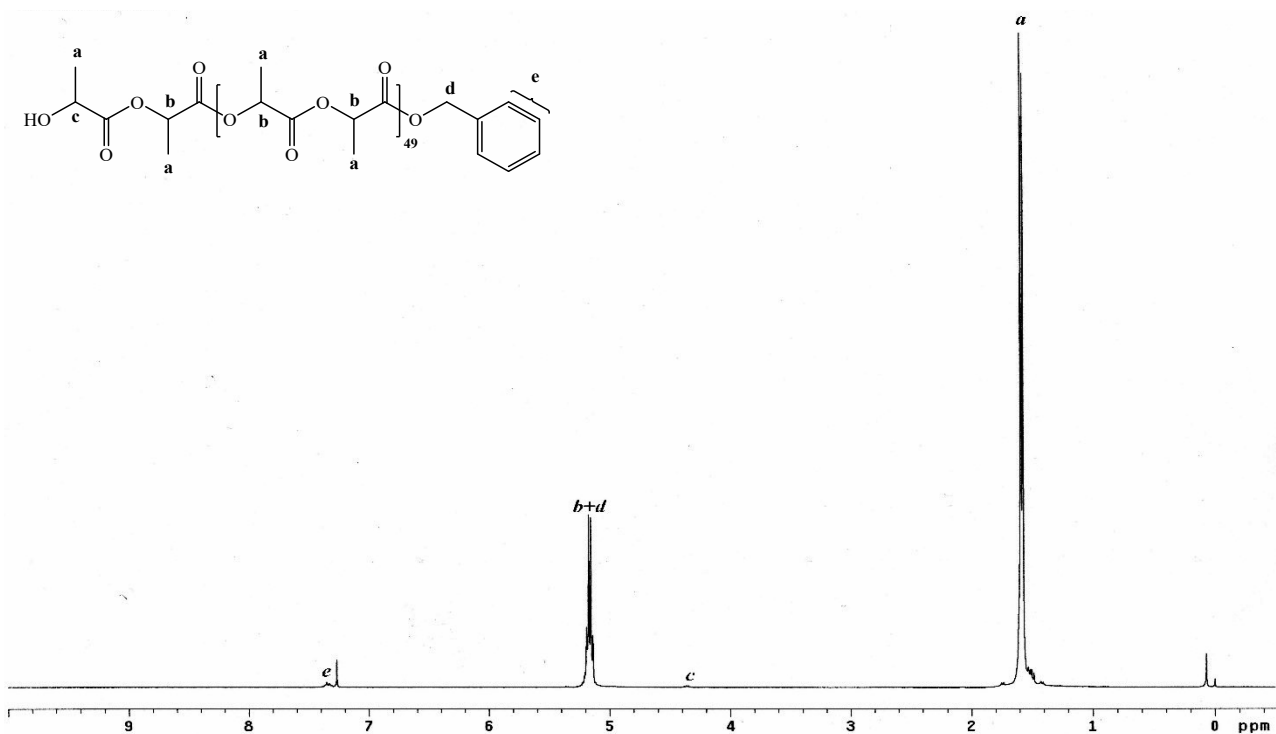

**Figure S5.** The <sup>1</sup>H NMR spectrum (CDCl<sub>3</sub>) of PLA-50 catalyzed by **2**/BnOH in toluene at 50°C.

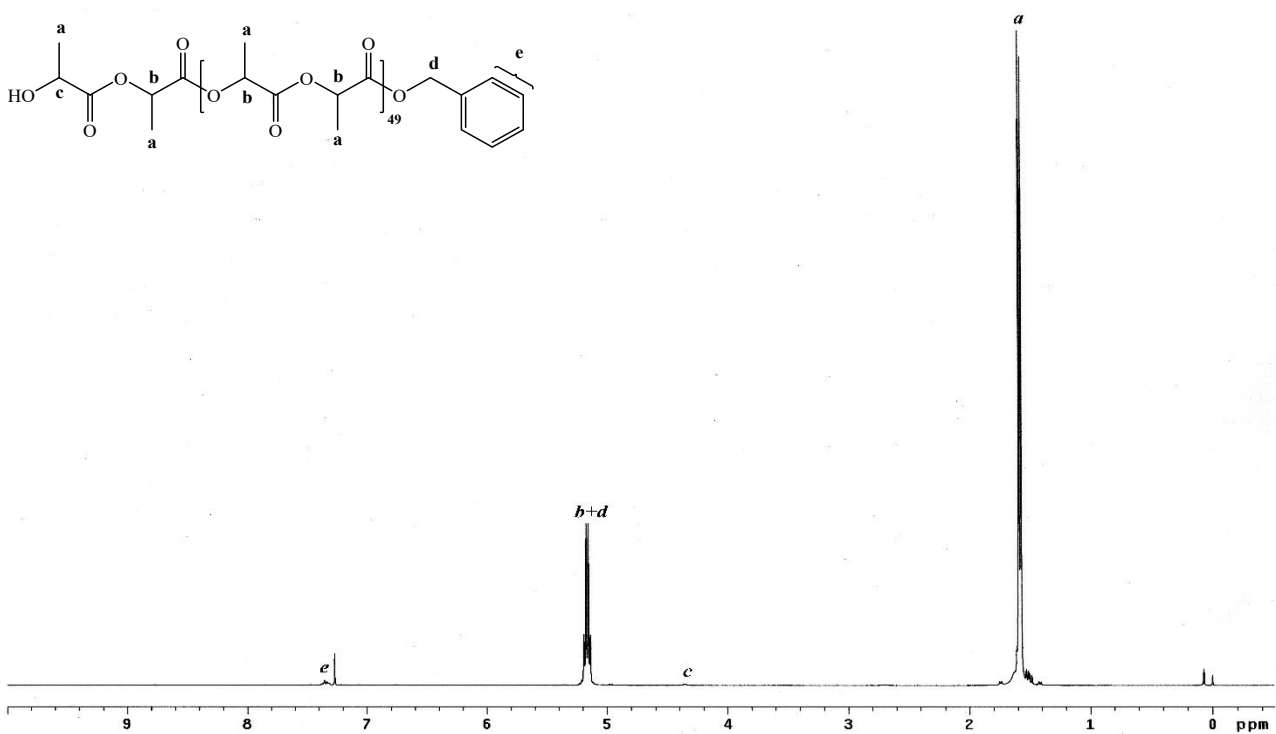

**Figure S6.** The <sup>1</sup>H NMR spectrum (CDCl<sub>3</sub>) of PLA-50 catalyzed by **7**/BnOH in toluene at 25°C.

## $^1\text{H}$ NMR study of the Mechanism in the ROP of L-lactide

\*\*\* In a typical experiment, a J. Young NMR tube was charged with a solution of complex (0.0125 mmol for **1**; 0.025 mmol for **7**), benzyl alcohol (0.025 mmol, 2.6  $\mu\text{L}$ ), and L-lactide (1.25 mmol, 0.18 g) in 0.8 mL of  $d_8$ -toluene. The tube was then transferred to the spectrometer, and  $^1\text{H}$  NMR spectra were recorded at the reaction temperature at different time. The internal standard was referenced to  $d_8$ -toluene (2.35 ppm).

For complex **1**

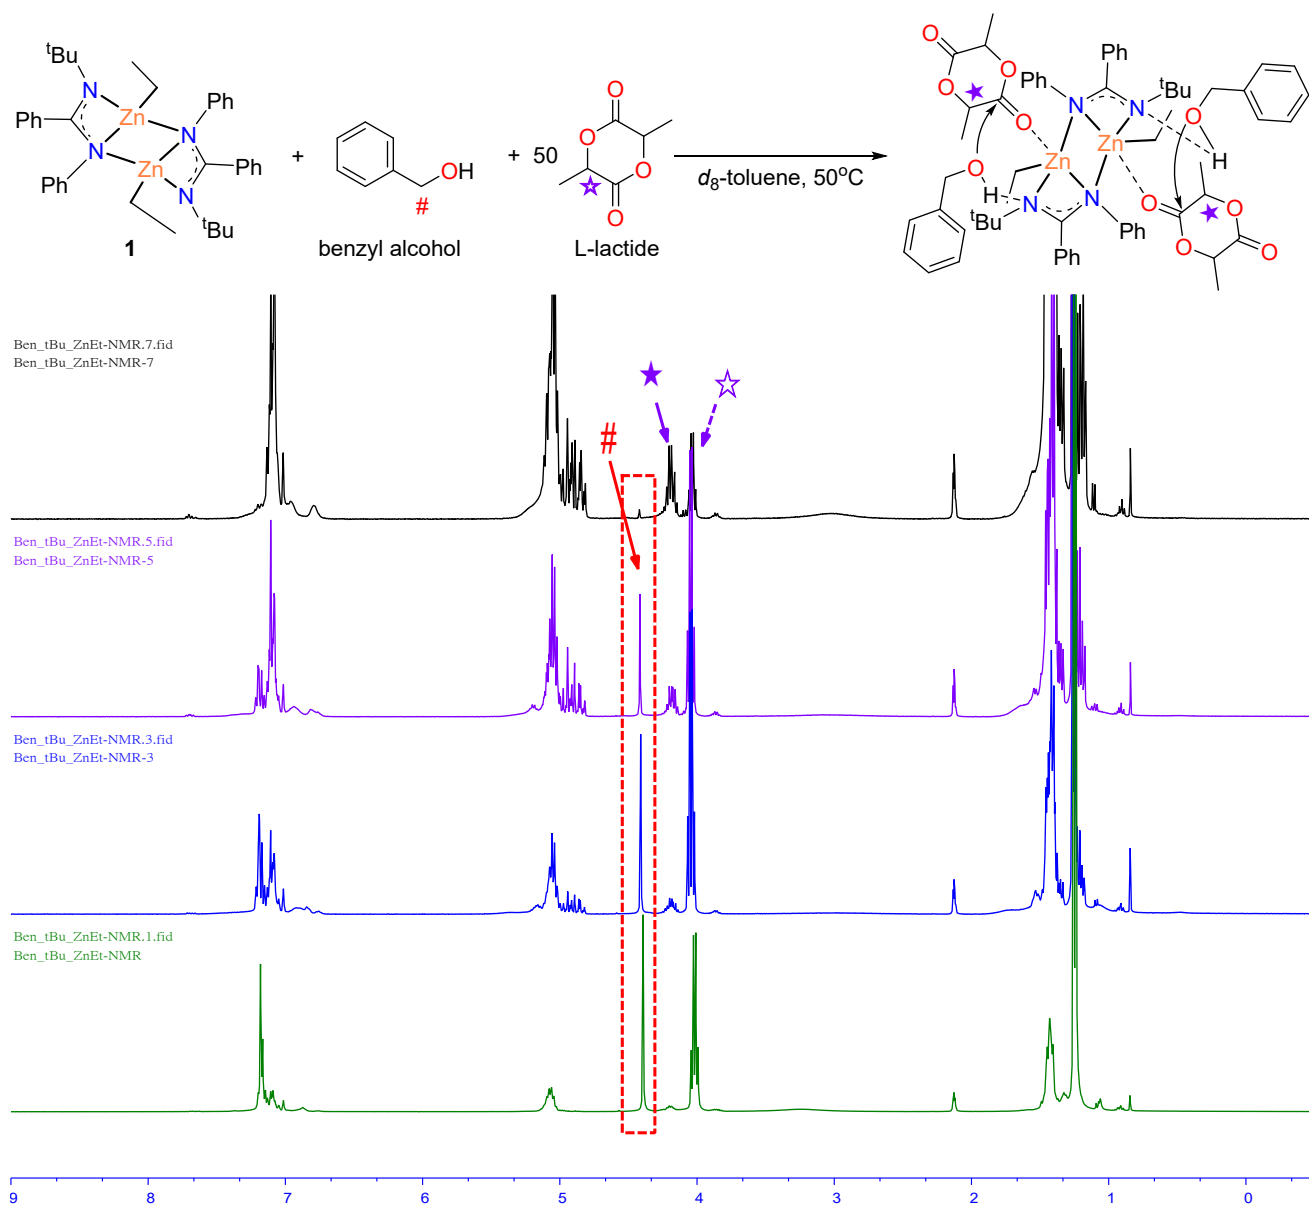

**Figure S7.**  $^1\text{H}$  NMR spectra of complex **1**/BnOH/L-LA at different time at 50°C in  $d_8$ -toluene (#benzyl alcohol; ★activated L-lactide).



For complex **7**

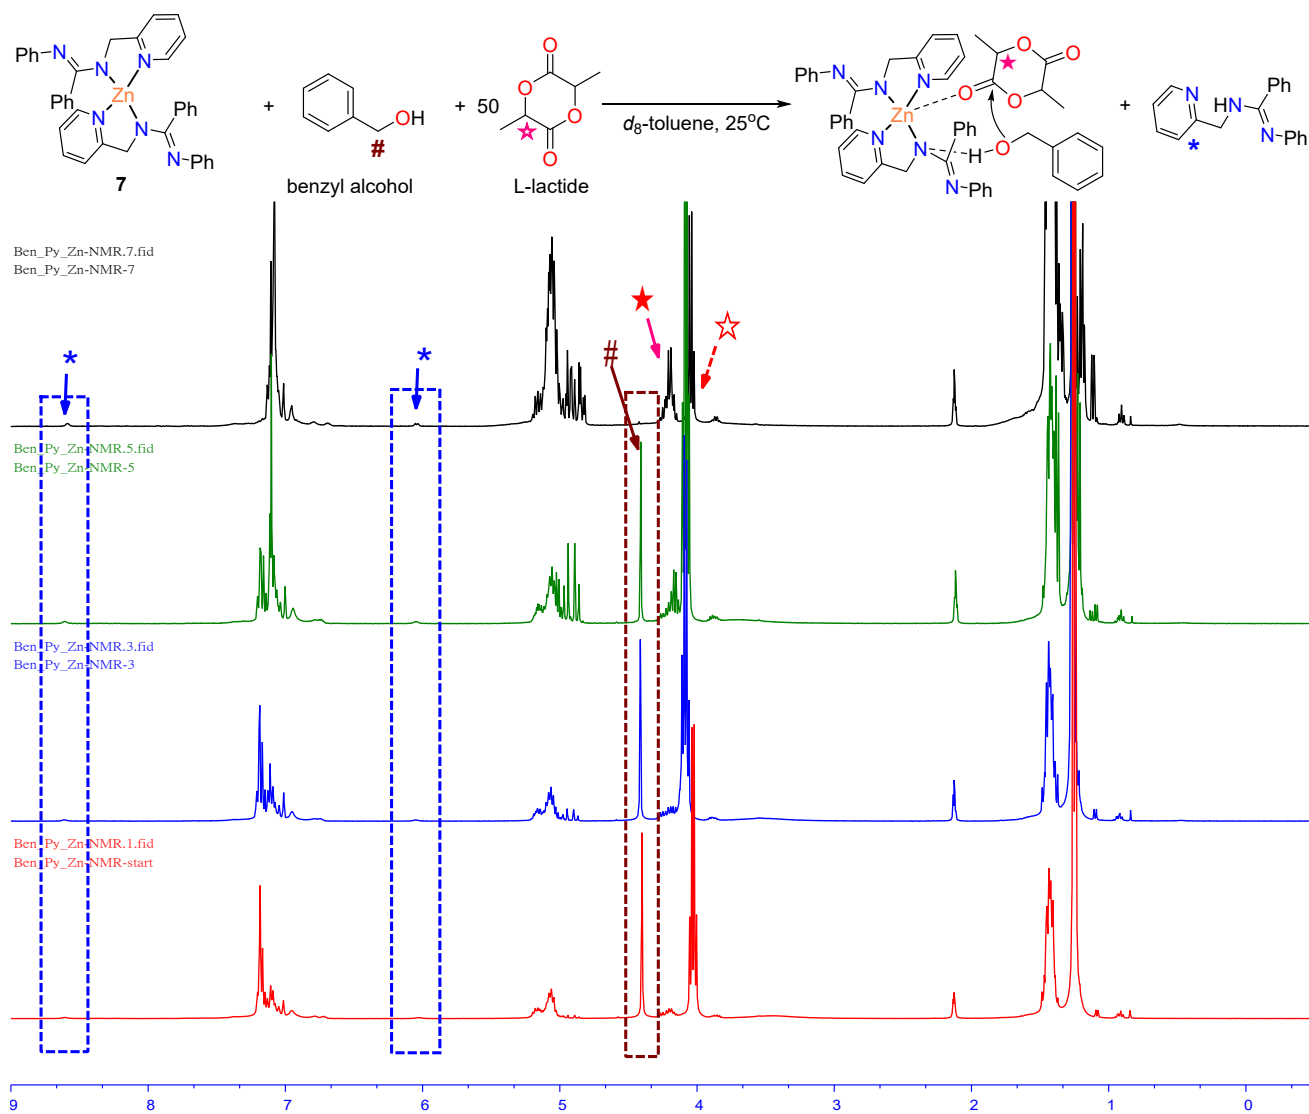

**Figure S8.**  $^1\text{H}$  NMR spectra of complex **7**/BnOH/L-LA at different time at 25°C in  $d_8$ -toluene (\*ligand precursor **L1d**; #benzyl alcohol; ★activated L-lactide).

## MALDI-TOF mass analysis of prepared PLAs

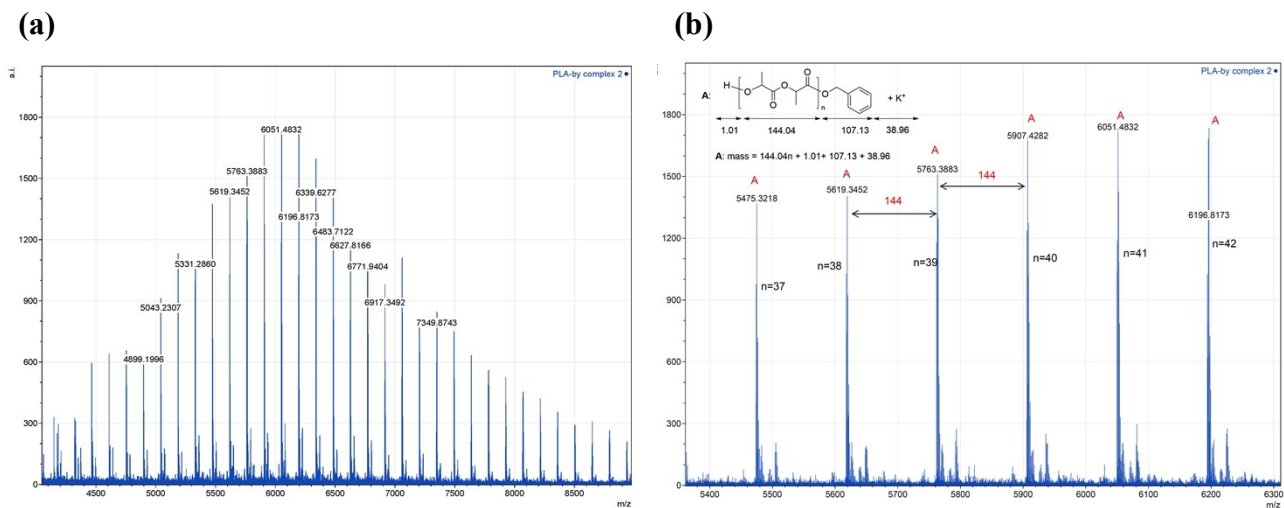

**Figure S9.** (a)-(b) MALDI-TOF spectrum of PLA initiated by L-LA/complex 2/BnOH (Table 2, entry 11).

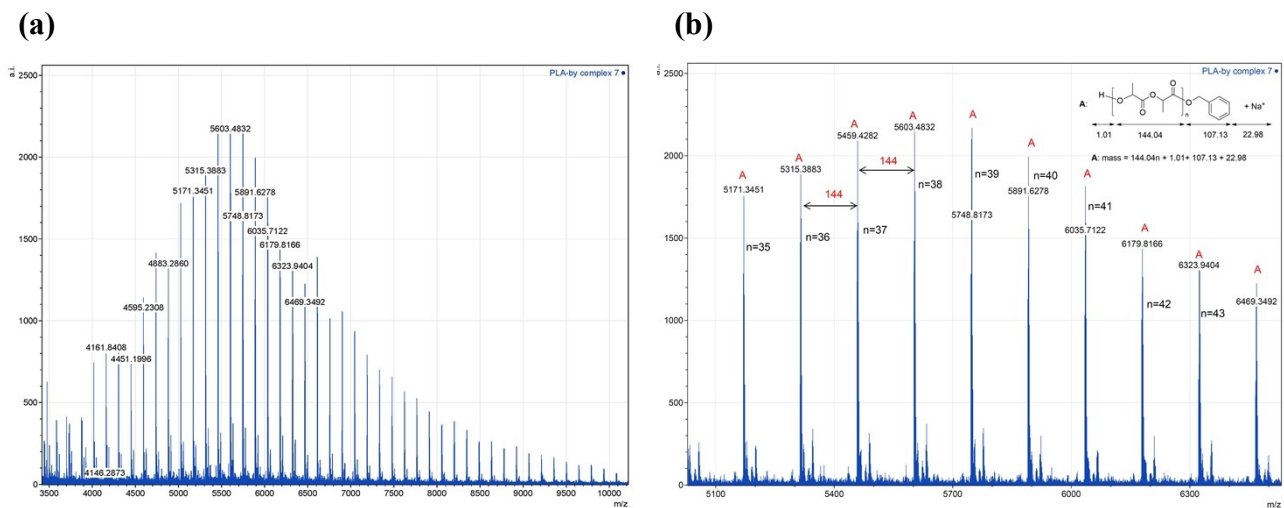

**Figure S10.** (a)-(b) MALDI-TOF spectrum of PLA initiated by L-LA/complex 7/BnOH (Table 2, entry 1).
